# Supplementary material for: Distribution of insulin in trigeminal nerve and brain after intranasal administration
Source: PubMed Central journal article supplement (PMC6385374; doi:10.1038/s41598-019-39191-5), 2019-02-22
Supplement: 41598_2019_39191_MOESM1_ESM.pdf [file 41598_2019_39191_MOESM1_ESM.pdf]

Distribution of insulin in trigeminal nerve and brain after intranasal administration

Jeffrey J. Lochhead, Kathryn L. Kellohen, Patrick T. Ronaldson, Thomas P. Davis

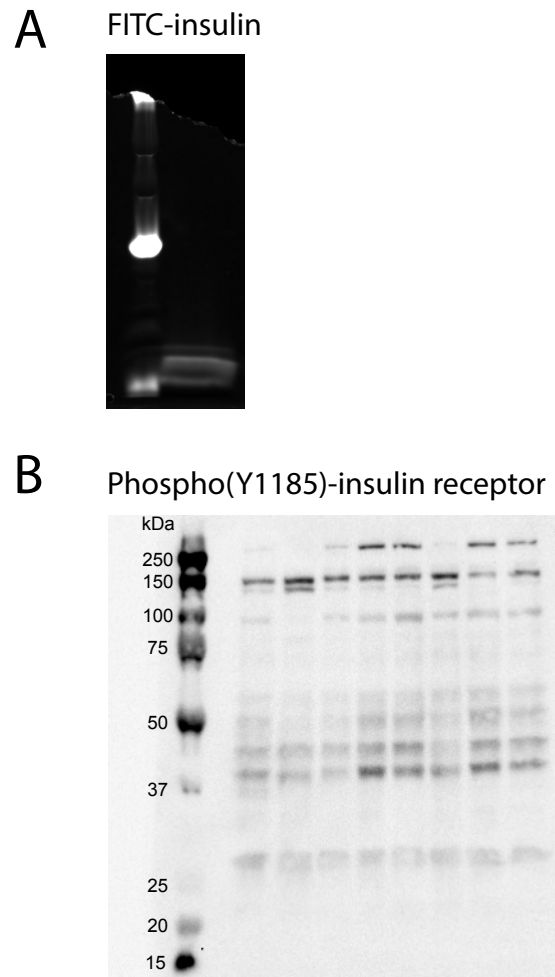

Supplementary Figure 1 - Full length images of the gel which FITC-insulin was run on (A) and the Western blot analyzed for phospho(Y1185) insulin receptor expression (B).
